# Supplementary material for: Is it a matter of urgency? A survey of assessments by walk-in patients and doctors of the urgency level of their encounters at a general emergency outpatient clinic in Oslo, Norway
Source: PubMed Central journal article supplement (PMC4932670; doi:10.1186/s12873-016-0086-1), 2016-07-04
Supplement: 12873_2016_86_MOESM2_ESM.pdf [file 12873_2016_86_MOESM2_ESM.pdf]

Additional file 2

Concordance for urgency assessment levels between patients and doctors stratified by consultation results. A: Received final treatment at the emergency clinic, B: Admitted to hospital/decision unit or referred to a specialist and C: RGP follow up

A:

**Doctors' assessment of urgency level**

| <b>Patients' assessment of urgency level</b> | Less than one hour | Within a few hours | Non-urgent      | Total            |
|----------------------------------------------|--------------------|--------------------|-----------------|------------------|
|                                              | n                  | n                  | n               | n (%)            |
| Less than one hour                           | 4                  | 76                 | 158             | 238 (24)         |
| Within a few hours                           | 4                  | 127                | 355             | 486 (49)         |
| Non-urgent                                   | 0                  | 43                 | 232             | 275 (27)         |
| <b>Total n (%)</b>                           | <b>8 (1)</b>       | <b>246 (24)</b>    | <b>745 (75)</b> | <b>999 (100)</b> |

Concordance: Kendall tau-b score = 0.143 (p < 0.001)

B:

**Doctors' assessment of urgency level**

| <b>Patients' assessment of urgency level</b> | Less than one hour | Within a few hours | Non-urgent     | Total            |
|----------------------------------------------|--------------------|--------------------|----------------|------------------|
|                                              | n                  | n                  | n              | n (%)            |
| Less than one hour                           | 7                  | 73                 | 14             | 94 (39)          |
| Within a few hours                           | 8                  | 99                 | 15             | 122 (50)         |
| Non-urgent                                   | 0                  | 15                 | 13             | 28 (11)          |
| <b>Total n (%)</b>                           | <b>15 (6)</b>      | <b>187 (77)</b>    | <b>42 (17)</b> | <b>244 (100)</b> |

Concordance: Kendall tau-b score = 0.145 (p = 0.029)

C:

**Doctors' assessment of urgency level**

| <b>Patients' assessment of urgency level</b> | Less than one hour | Within a few hours | Non-urgent      | Total            |
|----------------------------------------------|--------------------|--------------------|-----------------|------------------|
|                                              | n                  | n                  | n               | n (%)            |
| Less than one hour                           | 1                  | 14                 | 31              | 46 (26)          |
| Within a few hours                           | 0                  | 19                 | 74              | 93 (52)          |
| Non-urgent                                   | 0                  | 4                  | 36              | 40 (22)          |
| <b>Total n (%)</b>                           | <b>1 (1)</b>       | <b>37 (20)</b>     | <b>141 (79)</b> | <b>179 (100)</b> |

Concordance: Kendall tau-b score = 0.185 (p = 0.008)
