# Supplementary material for: Is it a matter of urgency? A survey of assessments by walk-in patients and doctors of the urgency level of their encounters at a general emergency outpatient clinic in Oslo, Norway
Source: PubMed Central journal article supplement (PMC4932670; doi:10.1186/s12873-016-0086-1), 2016-07-04

Additional file 4

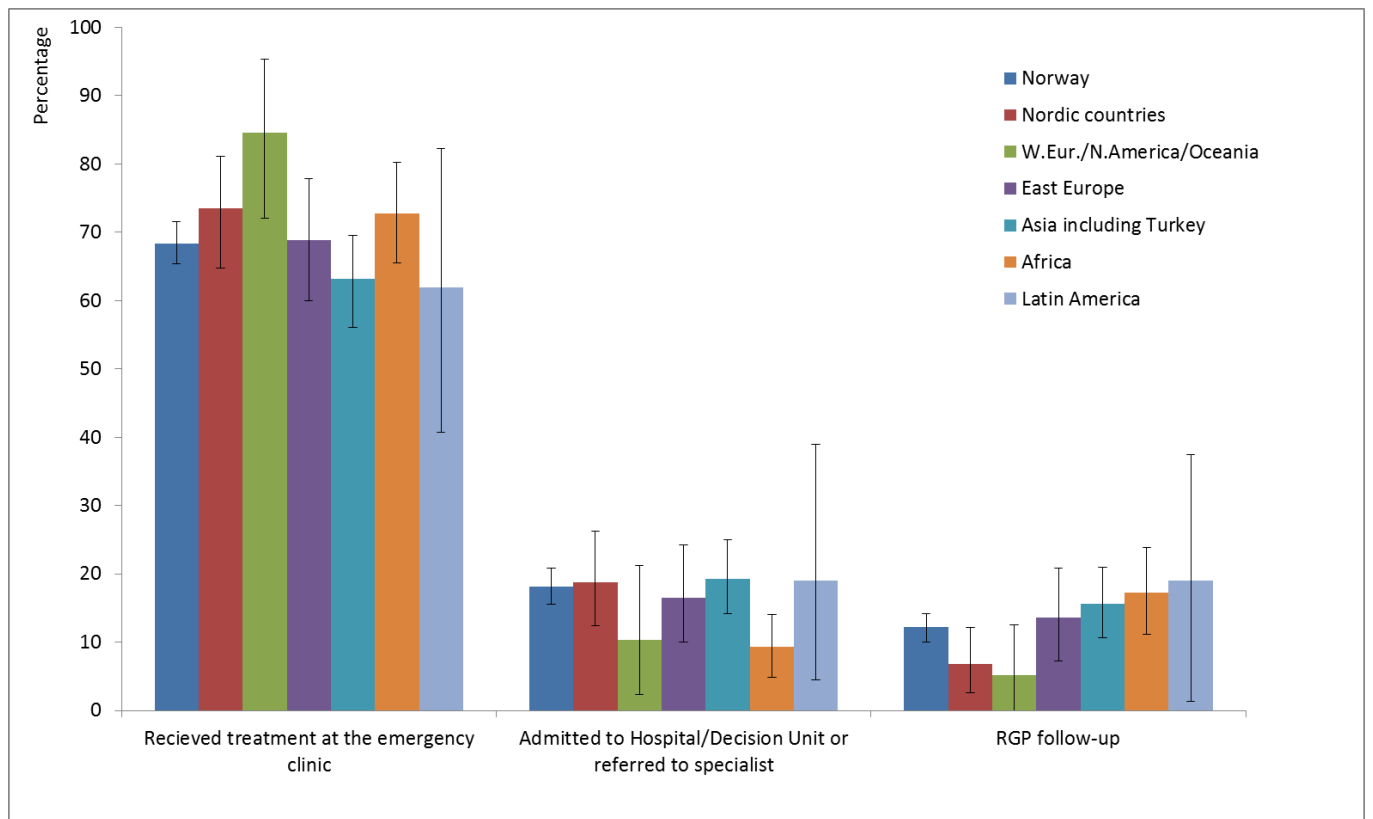

Supplement: 12873_2016_86_MOESM4_ESM.pdf [file 12873_2016_86_MOESM4_ESM.pdf]
