# Supplementary material for: Is it a matter of urgency? A survey of assessments by walk-in patients and doctors of the urgency level of their encounters at a general emergency outpatient clinic in Oslo, Norway
Source: Springer Nature journal article supplement (doi:10.1186/s12873-016-0086-1), 2016-07-04
Supplement: MOESM3 [file 10333064]

Additional file 3

|                                      | Patients' assessment |                    | Doctors' assessment |                    |
|--------------------------------------|----------------------|--------------------|---------------------|--------------------|
|                                      | Unadjusted           | Adjusted           | Unadjusted          | Adjusted           |
|                                      | OR (95% CI)          | OR (95% CI)        | OR (95% CI)         | OR (95% CI)        |
| <b>Country/region of origin</b>      |                      |                    |                     |                    |
| Norway                               | 1                    | 1                  | 1                   | 1                  |
| Nordic countries                     | 0.66 (0.45-0.96)*    | 0.86 (0.52-1.41)   | 0.64 (0.42-0.97)*   | 0.73 (0.45-1.20)   |
| West Eur. / N. America and Oceania   | 1.18 (0.62-2.25)     | 1.00 (0.47-2.13)   | 0.92 (0.47-1.81)    | 1.10 (0.54-2.24)   |
| East Europe                          | 3.18 (1.76-5.74)**   | 2.62 (1.36-5.02)*  | 0.76 (0.49-1.16)    | 0.82 (0.51-1.33)   |
| Asia with Turkey                     | 3.68 (2.34-5.77)**   | 3.76 (2.25-6.28)** | 1.04 (0.77-1.41)    | 0.99 (0.71-1.39)   |
| Africa                               | 4.25 (2.42-7.47)**   | 9.26 (3.97-21.6)** | 0.49 (0.33-0.72)**  | 0.63 (0.41-0.97)*  |
| Latin America                        | 1.70 (0.64-4.55)     | 1.52 (0.52-4.81)   | 1.21 (0.53-2.80)    | 1.16 (0.47-2.82)   |
| <b>Gender</b>                        |                      |                    |                     |                    |
| Female                               |                      | 1                  |                     | 1                  |
| Male                                 |                      | 1.16 (0.89-1.52)   |                     | 0.95 (0.75-1.18)   |
| <b>Age</b>                           |                      |                    |                     |                    |
| 0 – 19                               |                      | 1                  |                     | 1                  |
| 20 – 39                              |                      | 0.94 (0.69-1.28)   |                     | 1.25 (0.94-1.65)   |
| 40 – 59                              |                      | 2.00 (1.23-3.26)*  |                     | 1.99 (1.39-2.85)** |
| ≥ 60                                 |                      | 1.83 (0.76-4.43)   |                     | 2.01 (1.06-3.80)*  |
| <b>Occupational status</b>           |                      |                    |                     |                    |
| Employee                             |                      | 1                  |                     | 1                  |
| Social welfare benefits <sup>1</sup> |                      | 1.33 (0.73-2.44)   |                     | 0.92 (0.59-1.42)   |
| Unemployed                           |                      | 0.92 (0.46-1.87)   |                     | 1.19 (0.68-2.07)   |
| Homemaker                            |                      | 2.50 (0.56-11.1)   |                     | 1.03 (0.50-2.13)   |
| Pensioner                            |                      | 1.49 (0.51-4.36)   |                     | 1.28 (0.62-2.64)   |
| Student                              |                      | 0.61 (0.44-0.86)*  |                     | 0.87 (0.64-1.20)   |
| Other                                |                      | 0.73 (0.39-1.86)   |                     | 0.75 (0.36-1.53)   |
| <b>Self-reported RGP status</b>      |                      |                    |                     |                    |
| Registered                           |                      | 1                  |                     | 1                  |
| Not registered                       |                      | 0.73 (0.47-1.13)   |                     | 0.95 (0.64-1.40)   |
| <b>Time of consultation</b>          |                      |                    |                     |                    |
| 08:00am – 03:59pm                    |                      | 1                  |                     | 1                  |
| 04:00pm – 10:59pm                    |                      | 1.10 (0.84-1.44)   |                     | 1.17 (0.92-1.47)   |
| 11:00pm – 07:59am                    |                      | 2.79 (1.53-5.06)** |                     | 2.32 (1.58-3.42)** |

<sup>1</sup>On sick leave/disability benefit/rehabilitation benefit. Def. RGP: regular general practitioner  
Norwegians used as the reference group. OR (Odds ratio).

\*Significant result at the  $p < 0.05$  level, \*\*  $p < 0.001$
